# Supplementary material
Source: PubMed Central journal article supplement (PMC3910870)
Supplement: AAC.01855-13_zac002142613so1.pdf [file AAC.01855-13_zac002142613so1.pdf]

1 **Supplemental Material for Online Posting**

2 **Reversible Cysteine Protease Inhibitors Show Promise for a Chagas Cure**

3

4 **Chow Preparation of Cz007 and Cz008:** The milled test article needed for the study was  
5 placed in a mortar (~3" diameter) and the same weight of powdered chow was added. The  
6 mixture was ground with a pestle. Once homogeneous, the volume was doubled with fresh chow  
7 and the mixture ground with a pestle again to homogeneity (e.g.) 100 mg of drug +100 mg of  
8 chow = 200 mg of material to which is added 200 mg of drug-free chow. The mixture was  
9 doubled again and ground with a pestle until homogeneous. The dilution process was repeated  
10 until the capacity of the mortar was reached. The chow containing the drug was then transferred  
11 in a larger mortar (~8" diameter) to be further diluted. To prevent any loss of drug, the small  
12 mortar and its corresponding pestle were rinsed twice with drug-free powdered chow that was  
13 ground for few seconds in the small mortar before being added to the larger mortar. The addition  
14 of chow was repeated as described earlier until the total amount of chow containing the drug  
15 reached ~100g. The chow containing the drug was then transferred to a stainless steel bowl (~20"  
16 diameter) and the mortar was rinsed as described earlier with drug-free chow. From that point,  
17 the chow was stirred with an electric egg beater at moderate speed for at least 2 minutes between  
18 each addition of drug-free chow. The volume was doubled with each addition of fresh chow.  
19 Once the capacity of the bowl was reached, the chow containing the drug was transferred to a  
20 plastic barrel and the mixing of the chow was done by rolling the barrel vigorously on the floor  
21 for 5 min between each addition of drug-free chow. Test article laden chow was stored at 4-6°C  
22 until use.

23

24 **Cytotoxicity of CPIs in J774 Cells.** J774 murine macrophages were seeded in 96-well flat  
 25 bottom micro plates (Immunolon, Ottawa, ON) at  $10^5$  cells/well and were incubated at 37 °C for  
 26 24 h with 200  $\mu$ L RPMI without phenol red. After the incubation time, the media was replaced  
 27 with fresh media containing the test compounds at final concentrations of 10, 30, 50 and 100  $\mu$ M  
 28 and the incubation continued at 37 °C for 6, 12, 24 and 48 h. At required time points, 36  $\mu$ L of  
 29 tetrazolium salt 2,3-bis[2-methoxy-4-nitro-5-sulphophenyl]-2H-tetrazolium-5-carboxyaniline  
 30 (XTT) (Sigma) working solution was added to each well. The working solution was prepared  
 31 immediately prior to culture application by mixing 1 mL of XTT (2 mg/mL in PBS stock  
 32 solution with 20  $\mu$ L of PMS (1.53 mg/mL in PBS). The microplates were incubated at 37°C and  
 33 optical density was read at 450 nm (Kc Junior, Winooski, VT) every hour for a period of 4 hours  
 34 for each time point (Ref S1).

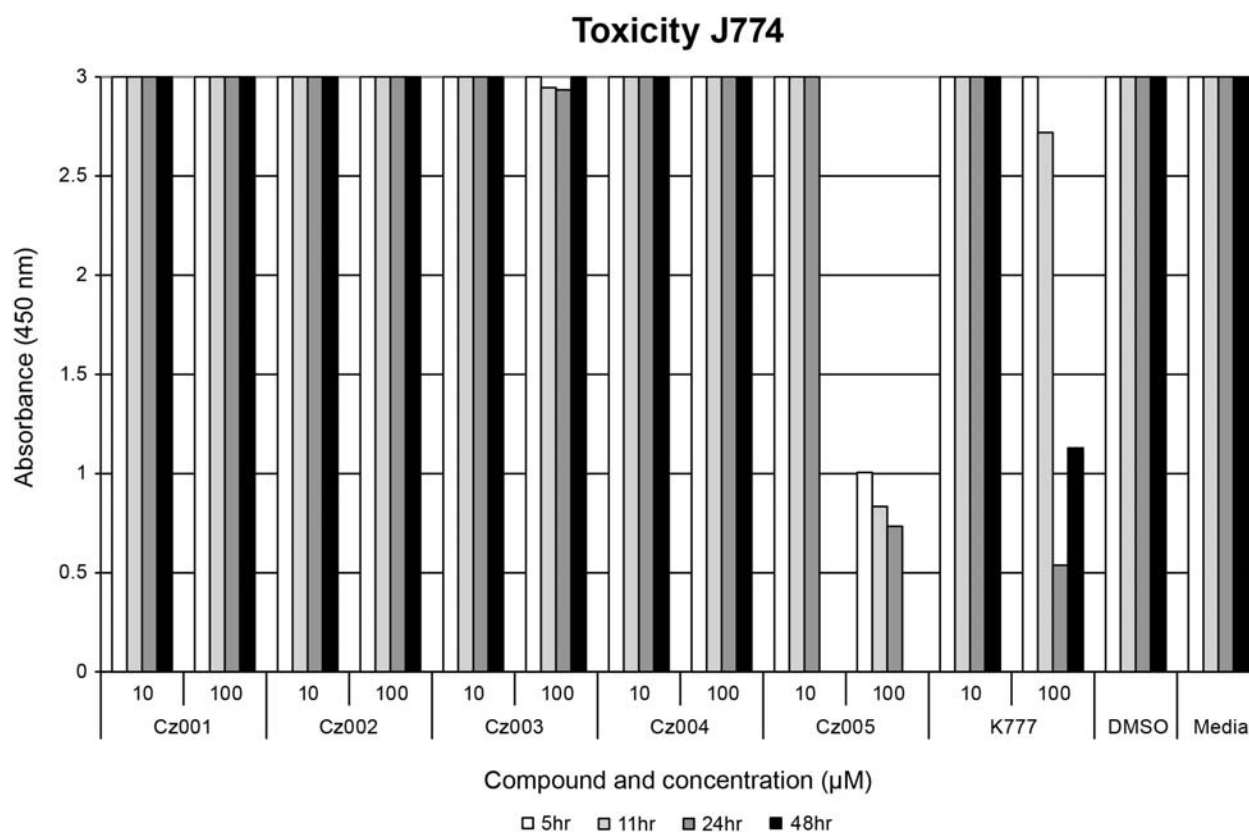

35

36 Figure S1. Toxicity testing of cruzipain inhibitors in macrophage cell line J774.

37 **Murine Pilot Inoculation Study:** Ten male CD-1 mice 6-8 weeks old and weighing an average  
38 of 30g were infected with  $10^4$  trypomastigotes of *T. cruzi*. The trypomastigotes were harvested  
39 as described above. The course of infection was followed for 54 days, with body weight and  
40 body temperature measured every day. For parasitemia assessment, a 10  $\mu$ L blood sample was  
41 taken from the tail vein three times a week. Parasitemia was determined by manual count using  
42 a Neubauer Chamber. The limit of detection was 1 parasite in 20 fields which corresponds to  
43  $2.5 \times 10^5$  parasites per mL of blood as described by (Ref S2). On Day 54, the mice were  
44 euthanized and tissues such as the heart, spleen, esophagus and liver were harvested to determine  
45 the presence of parasites by qualitative PCR. The blood also was collected for qualitative PCR  
46 and ELISA.

47

48 **ELISA Assay.** Antibody titers against *T. cruzi* were detected by coating 96-wells plates  
49 (Immulon 2; Thermo Labsystems, Franklin, Mass) overnight with  $10^6$  epimastigotes (100  $\mu$ L per  
50 well), in 1M sodium carbonate buffer (pH 9.6). Plates were blocked with PBS-5% bovine serum  
51 albumin-0.1 %Tween [Sigma] for 1 hour at 37°C. Serum samples were diluted in blocking buffer  
52 (1:400), added in duplicate and incubated for 1 hour at 37 °C. An Antimouse IgG was diluted at  
53 1:2,000 and added for 30 min at 37°C. 3,3',5,5'-tetramethylbenzidine (Millipore) substrate was  
54 added for 10 min and the colorimetric reaction was stopped with 1N sulfuric acid (Sigma). The  
55 optical density (OD) values were read at 450nm in an ELISA reader (Kc Junior).

56

57 **Results of Pilot Study.** In the pilot inoculation study, peak blood parasitemia was seen over  
58 days 8-20 post-inoculation and the average peak was  $\sim 3 \times 10^6$  parasites/mL of blood (range  
59  $1 \times 10^5$ - $1 \times 10^7$ ). No mortality was observed and body temperatures were in the normal range,

60 typically 35.5 to 37°C. Mice weights increased an average of 23% over the study, from 30 to 37  
 61 g, and no mortality was observed. Every mouse showed a positive PCR signal in blood at 54  
 62 days and the uninfected mice showed no signal. Trypomastigotes were also visually observed in  
 63 the peripheral blood from day 35 to 54. Qualitative PCR results from tissues only showed  
 64 positive results in the esophagus, spleens and hearts of 10-20% of the mice. This is in  
 65 accordance with previous findings (Ref S3). The livers were all negative. The ELISA analysis  
 66 and antibody titers in the blood at sacrifice were positive for all mice, with an OD range of ~1.0-  
 67 2.5 at 450 nM.

68  
 69

70 Table S1. qPCR at Day 90 for mice that died after cyclophosphamide treatment in in vivo  
 71 Experiment 2.

72

| Animal Code | Treatment<br>(Compound and Dose) | Day of Death:<br>(Cyclophosphamide Treatment was Day 90) | Blood qPCR on Day 90<br>(Parasites per mL) |
|-------------|----------------------------------|----------------------------------------------------------|--------------------------------------------|
| 4A2-2       | Vehicle (No treatment)           | 106                                                      | <5                                         |
| 3A2-1       | BNZ 50 mg/kg                     | 104                                                      | <5                                         |
| 3A2-4       | BNZ 50 mg/kg                     | 105                                                      | <5                                         |
| 3A2-5       | BNZ 50 mg/kg                     | 105                                                      | <5                                         |
| 2B1-4       | Cz007 10 mg/kg                   | 106                                                      | <5                                         |
| 2B2-4       | Cz007 10 mg/kg                   | 109                                                      | 100                                        |
| 2B2-5       | Cz007 10 mg/kg                   | 109                                                      | <5                                         |
| 2A1-3       | Cz007 50 mg/kg                   | 104                                                      | 100                                        |
| 1B2-5       | Cz008 3 mg/kg                    | 105                                                      | 100                                        |
| 1A1-2       | Cz008 10 mg/kg                   | 104                                                      | <5                                         |
| 1A2-4       | Cz008 10 mg/kg                   | 104                                                      | <5                                         |

73

**A Experiment 2: Cz007 Survival Data**

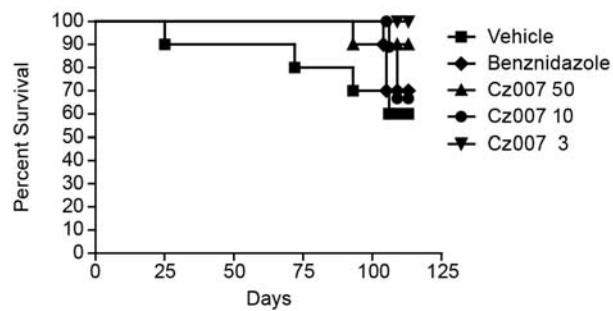

**B Experiment 2: Cz008 Survival Data**

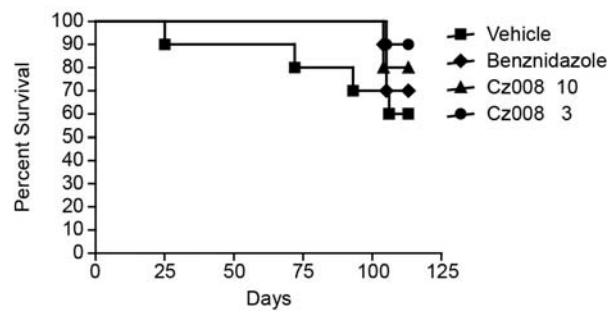

74  
75

76 Figure S2. Survival curves of in vivo murine Experiment 2. Cyclophosphamide treatment was  
77 administered at Day 90. Panel A is Cz007 and panel B is Cz008 for clarity of viewing.

78  
79

### 80 References for Supplementary Material Section

81  
82  
83  
84  
85  
86  
87  
88  
89  
90  
91  
92  
93  
94  
95

S1. **Korhonen, R., H. Kankaanranta, A. Lahti, M. Lahde, R. G. Knowles, and E. Moilanen.** 2001. Bi-directional effects of the elevation of intracellular calcium on the expression of inducible nitric oxide synthase in J774 macrophages exposed to low and to high concentrations of endotoxin. *Biochem.J* **354**:351-358.

S2. **Herbert, W. J. and W. H. Lumsden.** 1976. Trypanosoma brucei: a rapid "matching" method for estimating the host's parasitemia. *Exp.Parasitol.* **40**:427-431.

S3. **Guarner, J., J. Bartlett, S. R. Zaki, D. G. Colley, M. J. Grijalva, and M. R. Powell.** 2001. Mouse model for Chagas disease: immunohistochemical distribution of different stages of Trypanosoma cruzi in tissues throughout infection. *Am.J Trop.Med.Hyg.* **65**:152-158.
